# Supplementary material for: A novel function of BMHP1 and cBMHP1 peptides to induce the osteogenic differentiation of mesenchymal stem cells
Source: Royal Society of Chemistry journal article supplement (doi:10.1039/c4bm00300d), 2014-10-17
Supplement: c4bm00300d1.pdf [file c4bm00300d1.pdf]

**Electronic Supplementary Material (ESI)**

*of*

**A novel function of BMHP1 and cBMHP1 peptides to induce osteogenic  
differentiation of mesenchymal stem cells**

Feng-Yi Cao, Wei-Na Yin, Jin-Xuan Fan, Ren-Xi Zhuo and Xian-Zheng Zhang\*

Key Laboratory of Biomedical Polymers of Ministry of Education & Department of  
Chemistry, Wuhan University, Wuhan 430072, PR China

\* To whom correspondence should be addressed. E-mail: xz-zhang@whu.edu.cn.

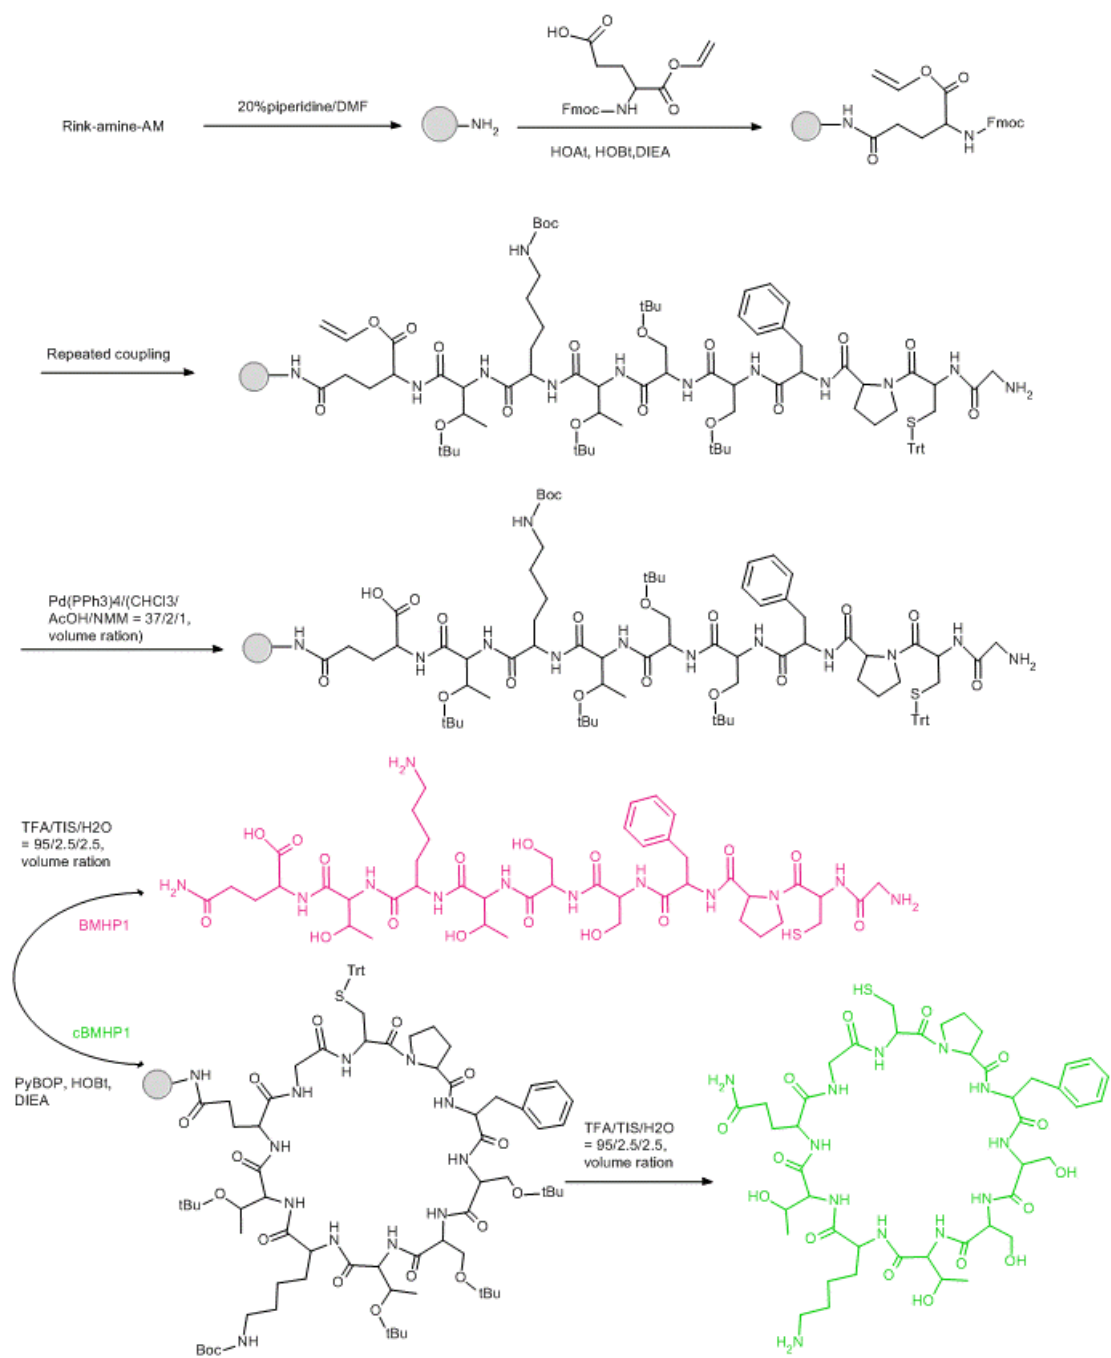

**Scheme S1.** The synthetic scheme of BMHP1 and cBMHP1 peptides

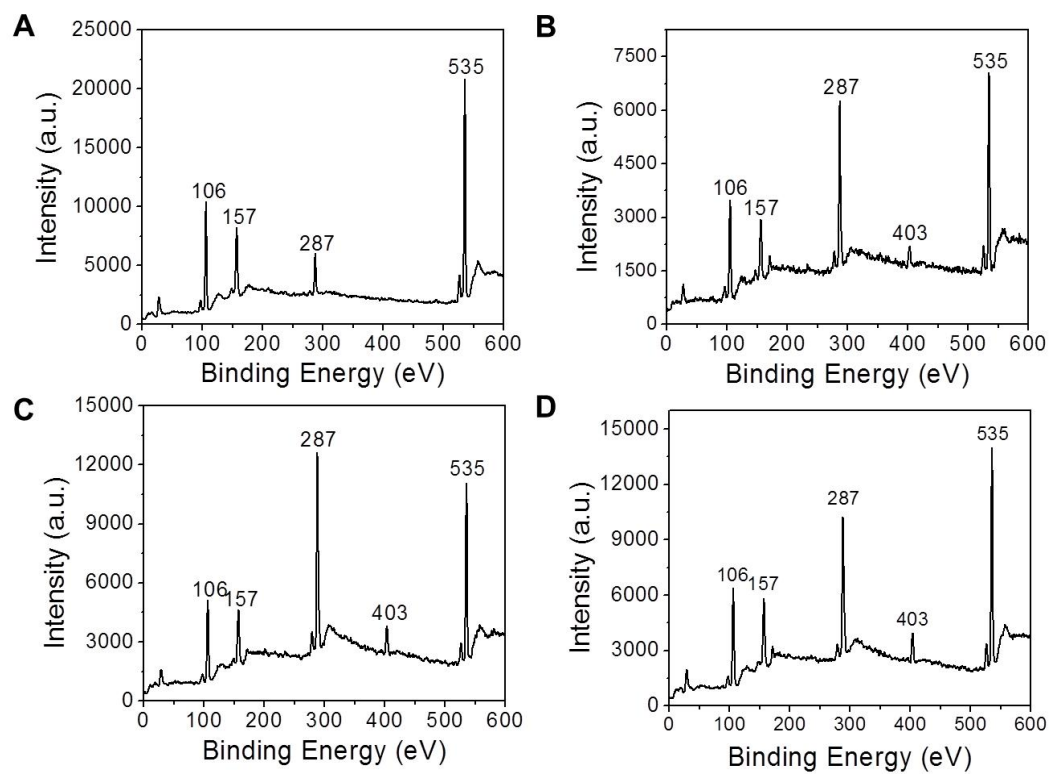

**Fig. S1** XPS (N 1s 403, O 1s 535, C 1s 287 and Si 2s 157, 2p 106) spectra of (A) OH-SAMs, (B) NH<sub>2</sub>-SAMs, (C) MA-SAMs, (D) 0.125BMHP1-SAMs.
